# Supplementary material for: Effects of Dendrobium officinale on the Quality of Rice Wine Fermented Separately by Saccharomyces cerevisiae and Wickerhamomyces anomalus: Physicochemical Indices, Volatile Compounds and Nonvolatile Metabolites
Source: MDPI journal article supplement (doi:10.3390/fermentation9070627), 2023-06-30
Supplement: s1 [file s1]

## Tables

**Table S1.** Sensory evaluation of *rice wine*

| Projects    | Scores 1-9                                                                                                                                            | Scores 10-19                                                                                                                        | Scores 20-25                                                                                                                           |
|-------------|-------------------------------------------------------------------------------------------------------------------------------------------------------|-------------------------------------------------------------------------------------------------------------------------------------|----------------------------------------------------------------------------------------------------------------------------------------|
| appearances | The product has the colour it should have, there is a large amount of sediment at the bottom of the packaging container, there are foreign impurities | The product has the colour it should have, with visible sediment at the bottom of the packaging container and no foreign impurities | The product has the colour it should have, with a trace of sediment at the bottom of the packaging container and no foreign impurities |
| Aromas      | Slight aroma of rice wine                                                                                                                             | Aromas characteristic of rice wine                                                                                                  | Aromas of rich rice wine, with no other aromas                                                                                         |
| Taste       | Poor taste with off flavors                                                                                                                           | Good mouthfeel, no off flavors                                                                                                      | Mellow, sweet, crisp, harmonious and free from unpleasant flavors                                                                      |
| Styles      | Almost unfermented rice wine style                                                                                                                    | With a fermented rice wine style                                                                                                    | A distinctive fermented rice wine style                                                                                                |

**Table S2.**Basic physical and chemical indices of rice wine

| Fermentation<br>methods | Alcohol content<br>(%vol) | Reducing sugars<br>(mg/mL) | Total sugars<br>(mg/mL)  | Total acids<br>(mg/mL)  | pH                      |
|-------------------------|---------------------------|----------------------------|--------------------------|-------------------------|-------------------------|
| SC                      | 14.70±0.57 <sup>a</sup>   | 25.76±0.80 <sup>c</sup>    | 42.13 ±3.98 <sup>d</sup> | 3.08±0.14 <sup>ab</sup> | 4.83±0.01 <sup>b</sup>  |
| DOSC                    | 14.50±0.94 <sup>a</sup>   | 24.18±1.82 <sup>cd</sup>   | 45.71±2.16 <sup>c</sup>  | 3.17±0.10 <sup>a</sup>  | 4.90±0.03 <sup>bc</sup> |
| WA                      | 6.80±0.76 <sup>c</sup>    | 122.31±4.16 <sup>a</sup>   | 140.65±4.58 <sup>a</sup> | 2.93±0.05 <sup>b</sup>  | 4.97±0.05 <sup>a</sup>  |
| DOWA                    | 12.88±0.0.63 <sup>b</sup> | 39.87±1.43 <sup>b</sup>    | 58.80±2.87 <sup>b</sup>  | 3.17±0.10 <sup>a</sup>  | 4.70±0.02 <sup>c</sup>  |

Different lowercase letters indicate significant differences, P<0.05.

**Table S3.**Active substance contents in rice wine

| Fermentation<br>methods | Polysaccharides (mg/mL) | Total flavonoids (mg/L)  | Total phenols (mg/L)       |
|-------------------------|-------------------------|--------------------------|----------------------------|
| SC                      | 0.44±0.08 <sup>d</sup>  | 27.62±4.11 <sup>d</sup>  | 641.88 ±10.60 <sup>d</sup> |
| DOSC                    | 2.40±0.07 <sup>b</sup>  | 137.73±4.26 <sup>b</sup> | 878.03±20.29 <sup>b</sup>  |
| WA                      | 1.05±0.04 <sup>c</sup>  | 87.23±5.83 <sup>c</sup>  | 822.47±21.12 <sup>c</sup>  |
| DOWA                    | 2.91±0.13 <sup>a</sup>  | 157.07±6.00 <sup>a</sup> | 926.18±3.87 <sup>a</sup>   |

Different lowercase letters indicate significant differences

**Table S4.** Compositions of free amino acids in rice wine.

| Flavoring characteristics | Free amino acid types (mg/100g) | Fermentation methods    |                         |                         |                         |
|---------------------------|---------------------------------|-------------------------|-------------------------|-------------------------|-------------------------|
|                           |                                 | SC                      | DOSC                    | WA                      | DOWA                    |
| Harmonious taste          | ASP                             | 3.30±0.50 <sup>d</sup>  | 5.13±0.23 <sup>c</sup>  | 8.20±0.26 <sup>b</sup>  | 9.60±0.10 <sup>a</sup>  |
|                           | GLU                             | 6.30±0.30 <sup>c</sup>  | 12.50±0.10 <sup>b</sup> | 5.97±0.32 <sup>c</sup>  | 17.17±0.60 <sup>a</sup> |
|                           | Total                           | 9.60                    | 17.63                   | 14.17                   | 26.77                   |
| sweet taste               | MET                             | 2.10±0.40 <sup>d</sup>  | 2.80±0.10 <sup>bc</sup> | 4.09±0.62 <sup>a</sup>  | 3.93±0.47 <sup>a</sup>  |
|                           | GLY                             | 2.05±0.05 <sup>e</sup>  | 3.57±0.31 <sup>d</sup>  | 6.60±0.61 <sup>c</sup>  | 8.53±0.90 <sup>b</sup>  |
|                           | ALA                             | 8.40±0.20 <sup>d</sup>  | 12.57±0.12 <sup>c</sup> | 26.23±1.15 <sup>b</sup> | 28.80±0.98 <sup>a</sup> |
|                           | CYS                             | 1.00±0.00 <sup>ab</sup> | 1.30±0.10 <sup>ab</sup> | 1.20±0.17 <sup>ab</sup> | 1.57±0.35 <sup>a</sup>  |
|                           | PRO                             | 6.05±0.65 <sup>c</sup>  | 7.80±0.17 <sup>b</sup>  | 8.90±0.30 <sup>a</sup>  | 8.57±1.00 <sup>ab</sup> |
|                           | THR                             | 1.90±0.10 <sup>c</sup>  | 3.00±0.17 <sup>b</sup>  | 4.43±0.15 <sup>a</sup>  | 4.67±0.57 <sup>a</sup>  |
|                           | SER                             | 3.05±0.15 <sup>c</sup>  | 5.30±0.50 <sup>b</sup>  | 9.80±0.80 <sup>a</sup>  | 10.07±0.35 <sup>a</sup> |
|                           | Total                           | 24.55                   | 36.33                   | 61.25                   | 66.14                   |
|                           | ILE                             | 1.80±0.10 <sup>d</sup>  | 3.00±0.10 <sup>c</sup>  | 7.93±0.47 <sup>a</sup>  | 5.47±0.57 <sup>b</sup>  |
|                           | LEV                             | 6.35±0.35 <sup>d</sup>  | 9.87±0.38 <sup>c</sup>  | 19.23±1.40 <sup>a</sup> | 15.07±0.68 <sup>b</sup> |
| bitter taste              | VAL                             | 3.90±0.20 <sup>d</sup>  | 5.40±0.26 <sup>cd</sup> | 13.57±0.90 <sup>a</sup> | 9.20±1.47 <sup>b</sup>  |
|                           | PHE                             | 5.10±0.20 <sup>d</sup>  | 7.50±0.10 <sup>c</sup>  | 18.30±0.62 <sup>a</sup> | 13.60±0.53 <sup>b</sup> |
|                           | HIS                             | 0.60±0.00               | 0.87±0.06               | 0.90±0.30               | 1.13±0.23               |
|                           | LYS                             | 4.50±0.20 <sup>b</sup>  | 5.20±0.36 <sup>b</sup>  | 9.80±0.66 <sup>a</sup>  | 5.57±0.15 <sup>b</sup>  |
|                           | ARG                             | 4.40±0.20 <sup>b</sup>  | 6.60±0.56 <sup>b</sup>  | 5.10±0.35 <sup>b</sup>  | 8.50±0.72 <sup>a</sup>  |
|                           | 总计                              | 26.65                   | 38.43                   | 74.83                   | 58.54                   |
|                           | TYR                             | 4.15±0.15 <sup>c</sup>  | 5.80±0.10 <sup>b</sup>  | 8.73±0.67 <sup>ab</sup> | 9.40±0.92 <sup>a</sup>  |
| astringent taste          | Total                           | 4.15                    | 5.80                    | 8.73                    | 9.40                    |
|                           | Total                           | 64.95                   | 98.19                   | 158.98                  | 160.85                  |

Different lowercase letters indicate significant differences.

**Table S5.** Volatile Components contents of Rice Wine

| No. | Metabolite name               | SC( $\mu\text{g/L}$ )                 | DOSC( $\mu\text{g/L}$ )              | WA( $\mu\text{g/L}$ )              | DOWA( $\mu\text{g/L}$ )            |
|-----|-------------------------------|---------------------------------------|--------------------------------------|------------------------------------|------------------------------------|
| A1  | Ethanol                       | 94192.89 $\pm$ 11224.54 <sup>ab</sup> | 84641.08 $\pm$ 1975.10 <sup>bc</sup> | 20564.15 $\pm$ 976.87 <sup>d</sup> | 73550.20 $\pm$ 466.98 <sup>c</sup> |
| A2  | 1-Propanol                    | 44.97 $\pm$ 23.30 <sup>c</sup>        | 30.13 $\pm$ 0.92 <sup>d</sup>        | -                                  | 75.83 $\pm$ 16.89 <sup>b</sup>     |
| A3  | 2-methyl-1-Propanol           | 1331.47 $\pm$ 47.43 <sup>a</sup>      | 917.79 $\pm$ 32.92 <sup>b</sup>      | 168.62 $\pm$ 57.38 <sup>c</sup>    | 918.51 $\pm$ 237.27 <sup>b</sup>   |
| A4  | 3-methyl-1-Butanol            | 7460.73 $\pm$ 357.55 <sup>ab</sup>    | 6995.73 $\pm$ 104.71 <sup>bc</sup>   | 1888.64 $\pm$ 115.56 <sup>d</sup>  | 6781.78 $\pm$ 192.81 <sup>c</sup>  |
| A5  | 1-Pentanol                    | 20.77 $\pm$ 2.23 <sup>a</sup>         | -                                    | 8.85 $\pm$ 0.26 <sup>b</sup>       | -                                  |
| A6  | 1-Hexanol                     | 68.73 $\pm$ 2.41 <sup>a</sup>         | 30.71 $\pm$ 2.31 <sup>b</sup>        | 33.19 $\pm$ 4.33 <sup>b</sup>      | 27.60 $\pm$ 5.61 <sup>b</sup>      |
| A7  | 3-ethoxy-1-Propanol           | -                                     | -                                    | -                                  | 14.50 $\pm$ 4.9                    |
| A8  | 1-Heptanol                    | 44.29 $\pm$ 11.60 <sup>a</sup>        | 30.32 $\pm$ 2.72 <sup>bc</sup>       | 21.20 $\pm$ 4.03 <sup>ab</sup>     | 27.34 $\pm$ 3.14 <sup>bc</sup>     |
| A9  | 2,3-Butanediol                | 1157.83 $\pm$ 88.96 <sup>a</sup>      | 1044.90 $\pm$ 34.83 <sup>b</sup>     | 61.53 $\pm$ 12.45 <sup>d</sup>     | 399.92 $\pm$ 5.80 <sup>c</sup>     |
| A10 | Propylene Glycol              | 60.17 $\pm$ 7.12 <sup>b</sup>         | 70.49 $\pm$ 9.48 <sup>a</sup>        | -                                  | 35.30 $\pm$ 3.77 <sup>c</sup>      |
| A11 | 3-(methylthio)-1-Propanol     | 19.59 $\pm$ 9.33 <sup>bc</sup>        | 14.78 $\pm$ 0.72 <sup>cd</sup>       | 9.67 $\pm$ 1.50 <sup>d</sup>       | 26.79 $\pm$ 6.42 <sup>a</sup>      |
| A12 | Phenylethyl Alcohol           | 4180.66 $\pm$ 76.88 <sup>a</sup>      | 4377.31 $\pm$ 238.50 <sup>a</sup>    | 1647.02 $\pm$ 245.63 <sup>b</sup>  | 3864.30 $\pm$ 125.72 <sup>a</sup>  |
|     | <b>Total alcohols</b>         | <b>108582.10</b>                      | <b>99153.24</b>                      | <b>24402.87</b>                    | <b>85722.07</b>                    |
| B1  | Ethyl Acetate                 | -                                     | -                                    | 2549.51                            | 2701.49 $\pm$ 233.22               |
| B2  | 1-Butanol, 3-methyl-, acetate | 1156.62 $\pm$ 76.45 <sup>a</sup>      | 1126.24 $\pm$ 38.36 <sup>a</sup>     | 168.24 $\pm$ 37.12 <sup>c</sup>    | 845.49 $\pm$ 45.35 <sup>b</sup>    |
| B3  | Hexanoic acid, ethyl ester    | 367.61 $\pm$ 5.50 <sup>a</sup>        | 295.68 $\pm$ 22.69 <sup>b</sup>      | 62.23 $\pm$ 17.02 <sup>d</sup>     | 170.88 $\pm$ 40.42 <sup>c</sup>    |
| B4  | Acetic acid, hexyl ester      | -                                     | 15.48 $\pm$ 0.14                     | -                                  | -                                  |
| B5  | Heptanoic acid, ethyl ester   | 31.66 $\pm$ 16.36 <sup>b</sup>        | 27.18 $\pm$ 6.01 <sup>c</sup>        | 27.28 $\pm$ 9.43 <sup>c</sup>      | 35.66 $\pm$ 12.14 <sup>ab</sup>    |
| B6  | Octanoic acid, ethyl ester    | 4304.53 $\pm$ 155.13 <sup>a</sup>     | 1406.47 $\pm$ 113.10 <sup>b</sup>    | 365.90 $\pm$ 39.67 <sup>c</sup>    | 1544.76 $\pm$ 162.09 <sup>b</sup>  |
| B7  | Nonanoic acid, ethyl ester    | 99.83 $\pm$ 7.03 <sup>a</sup>         | 37.35 $\pm$ 7.05 <sup>cd</sup>       | 30.01 $\pm$ 7.70 <sup>d</sup>      | 86.04 $\pm$ 5.43 <sup>b</sup>      |
| B8  | Butyrolactone                 | 25.83 $\pm$ 12.71                     | 23.71 $\pm$ 4.22                     | -                                  | 15.84 $\pm$ 1.24                   |
| B9  | Decanoic acid, ethyl ester    | 10383.65 $\pm$ 338.57 <sup>a</sup>    | 579.44 $\pm$ 146.45 <sup>b</sup>     | 60.87 $\pm$ 2.58 <sup>d</sup>      | 295.85 $\pm$ 87.52 <sup>c</sup>    |
| B10 | Benzoic acid, ethyl ester     | -                                     | -                                    | 60.20 $\pm$ 18.12 <sup>b</sup>     | 121.91 $\pm$ 26.49 <sup>a</sup>    |

Table S5.Cont

| No. | Metabolite name                            | SC( $\mu\text{g/L}$ )             | DOSC( $\mu\text{g/L}$ )          | WA( $\mu\text{g/L}$ )            | DOWA( $\mu\text{g/L}$ )           |
|-----|--------------------------------------------|-----------------------------------|----------------------------------|----------------------------------|-----------------------------------|
| B11 | Acetic acid,<br>2-phenylethyl ester        | 555.25 $\pm$ 121.17 <sup>a</sup>  | 424.94 $\pm$ 26.75 <sup>b</sup>  | 40.70 $\pm$ 2.05 <sup>c</sup>    | 112.59 $\pm$ 16.46 <sup>c</sup>   |
| B12 | Dodecanoic acid,<br>ethyl ester            | 2911.55 $\pm$ 181.96 <sup>a</sup> | 106.08 $\pm$ 14.68 <sup>c</sup>  | 51.35 $\pm$ 2.65 <sup>c</sup>    | 1102.30 $\pm$ 25.37 <sup>b</sup>  |
| B13 | Pentadecanoic acid,<br>3-methylbutyl ester | 90.75 $\pm$ 24.36 <sup>a</sup>    | -                                | 19.82 $\pm$ 3.50 <sup>b</sup>    | 27.38 $\pm$ 2.13 <sup>b</sup>     |
| B14 | Benzenepropanoic<br>acid, ethyl ester      | 17.97 $\pm$ 2.70 <sup>a</sup>     | 10.97 $\pm$ 1.96 <sup>c</sup>    | 10.55 $\pm$ 3.61 <sup>c</sup>    | 15.97 $\pm$ 4.11 <sup>ab</sup>    |
| B15 | Eicosanoic acid,<br>ethyl ester            | 94.26 $\pm$ 12.65 <sup>a</sup>    | -                                | 25.74 $\pm$ 8.97 <sup>b</sup>    | 109.52 $\pm$ 11.89 <sup>a</sup>   |
| B16 | Tetradecanoic acid,<br>ethyl ester         | 757.64 $\pm$ 172.86 <sup>b</sup>  | 76.34 $\pm$ 5.22 <sup>d</sup>    | 297.66 $\pm$ 12.79 <sup>c</sup>  | 1097.51 $\pm$ 153.61 <sup>a</sup> |
| B17 | Pentadecanoic acid,<br>ethyl ester         | 211.12 $\pm$ 31.39 <sup>a</sup>   | -                                | 26.18 $\pm$ 7.36 <sup>c</sup>    | 158.10 $\pm$ 7.57 <sup>b</sup>    |
| B18 | Hexadecanoic acid,<br>ethyl ester          | 1040.42 $\pm$ 246.41 <sup>b</sup> | 435.59 $\pm$ 31.89 <sup>c</sup>  | 554.37 $\pm$ 160.91 <sup>c</sup> | 1594.31 $\pm$ 103.06 <sup>a</sup> |
| B19 | Ethyl Oleate                               | -                                 | -                                | 173.29 $\pm$ 13.76 <sup>b</sup>  | 379.15 $\pm$ 26.90 <sup>a</sup>   |
| B20 | Linoleic acid ethyl<br>ester               | -                                 | -                                | 152.32 $\pm$ 7.44 <sup>b</sup>   | 554.20 $\pm$ 124.52 <sup>a</sup>  |
|     | <b>Total esters</b>                        | <b>21948.69</b>                   | <b>4565.47</b>                   | <b>4676.22</b>                   | <b>10968.95</b>                   |
| C1  | Acetic acid                                | 839.41 $\pm$ 23.38 <sup>a</sup>   | 635.09 $\pm$ 120.29 <sup>c</sup> | 222.32 $\pm$ 21.05 <sup>d</sup>  | 732.25 $\pm$ 73.50 <sup>bc</sup>  |
| C2  | 2-methyl-Propanoic<br>acid                 | 55.84 $\pm$ 3.45 <sup>a</sup>     | -                                | -                                | 28.47 $\pm$ 0.07 <sup>b</sup>     |
| C3  | 3-methyl-Butanoic<br>acid                  | -                                 | -                                | 9.90 $\pm$ 1.97 <sup>b</sup>     | 30.96 $\pm$ 6.59 <sup>a</sup>     |
| C4  | 2-Amino-6-methyl<br>benzoic acid           | 121.83 $\pm$ 15.98 <sup>a</sup>   | 57.34 $\pm$ 11.38 <sup>b</sup>   | 27.49 $\pm$ 3.68 <sup>d</sup>    | 43.73 $\pm$ 8.27 <sup>c</sup>     |
| C5  | Neodecanoic acid                           | 106.64 $\pm$ 6.27 <sup>b</sup>    | 139.59 $\pm$ 23.58 <sup>a</sup>  | -                                | 79.01 $\pm$ 8.47 <sup>c</sup>     |
| C6  | Hexanoic acid                              | -                                 | 20.73 $\pm$ 2.26 <sup>a</sup>    | 2.33 $\pm$ 0.33 <sup>c</sup>     | 10.82 $\pm$ 0.22 <sup>b</sup>     |
| C7  | Octanoic acid                              | 74.81 $\pm$ 14.87 <sup>a</sup>    | 49.16 $\pm$ 2.31 <sup>b</sup>    | 7.45 $\pm$ 2.23 <sup>d</sup>     | 27.05 $\pm$ 0.41 <sup>c</sup>     |
|     | <b>Total acids</b>                         | <b>1198.53</b>                    | <b>901.91</b>                    | <b>269.49</b>                    | <b>952.29</b>                     |
| D1  | 2-Octanone                                 | 46.54 $\pm$ 5.65 <sup>b</sup>     | 47.10 $\pm$ 0.09 <sup>ab</sup>   | 43.74 $\pm$ 1.59 <sup>b</sup>    | 53.78 $\pm$ 6.11 <sup>a</sup>     |
| D2  | Acetoin                                    | 118.34 $\pm$ 10.62 <sup>b</sup>   | 174.84 $\pm$ 45.40 <sup>ab</sup> | 16.06 $\pm$ 2.22 <sup>c</sup>    | 32.70 $\pm$ 2.07 <sup>c</sup>     |
| D3  | 2,5-Hexanedione                            | 9.87 $\pm$ 1.11 <sup>a</sup>      | -                                | 5.17 $\pm$ 0.21 <sup>b</sup>     | 9.10 $\pm$ 1.73 <sup>a</sup>      |
|     | <b>Total ketone</b>                        | <b>174.75</b>                     | <b>221.94</b>                    | <b>64.97</b>                     | <b>95.58</b>                      |

**Table S5.Cont**

| No. | Metabolite name                | SC( $\mu\text{g/L}$ )             | DOSC( $\mu\text{g/L}$ )           | WA( $\mu\text{g/L}$ )          | DOWA( $\mu\text{g/L}$ )         |
|-----|--------------------------------|-----------------------------------|-----------------------------------|--------------------------------|---------------------------------|
| E1  | Propane,<br>1-(1-ethoxyethoxy) | 1645.87 $\pm$ 198.12 <sup>b</sup> | 1914.49 $\pm$ 419.08 <sup>a</sup> | -                              | -                               |
| E2  | Nonanal                        | 23.56 $\pm$ 2.37 <sup>a</sup>     | 21.60 $\pm$ 6.90 <sup>ab</sup>    | 12.33 $\pm$ 2.10 <sup>c</sup>  | 20.61 $\pm$ 3.09 <sup>b</sup>   |
| E3  | Decanal                        | 18.81 $\pm$ 4.06 <sup>c</sup>     | 26.16 $\pm$ 15.03 <sup>b</sup>    | 16.34 $\pm$ 4.23 <sup>cd</sup> | 30.36 $\pm$ 3.39 <sup>a</sup>   |
| E4  | Benzaldehyde                   | 12.29 $\pm$ 1.28 <sup>ab</sup>    | 14.48 $\pm$ 1.72 <sup>a</sup>     | 4.68 $\pm$ 1.23 <sup>b</sup>   | 15.34 $\pm$ 0.09 <sup>a</sup>   |
|     | <b>Total Aldehydes</b>         | <b>1700.53</b>                    | <b>1976.73</b>                    | <b>33.35</b>                   | <b>66.31</b>                    |
| F1  | 2-Methoxy-4-vinyl<br>phenol    | 38.06 $\pm$ 0.71 <sup>b</sup>     | 26.97 $\pm$ 3.43 <sup>c</sup>     | 125.93 $\pm$ 4.72 <sup>a</sup> | 122.27 $\pm$ 11.60 <sup>a</sup> |
|     | <b>Total phenols</b>           | <b>38.06</b>                      | <b>26.97</b>                      | <b>125.93</b>                  | <b>122.27</b>                   |
|     | <b>Totals</b>                  | <b>133642.66</b>                  | <b>106846.26</b>                  | <b>29572.83</b>                | <b>97927.47</b>                 |

- indicates no detection, different lowercase letters indicate significant differences among groups ( $p < 0.05$ ).
